# Supplementary material for: Efficacy and safety of moxibustion for ulcerative colitis: protocol for a systematic review and meta-analysis
Source: HighWire-hosted journal article supplement (doi:10.1136/bmjopen-2023-078878), 2024-03-01
Supplement: bmjopen-2023-078878supp002_data_supplement.pdf [file bmjopen-2023-078878supp002_data_supplement.pdf]

Supplementary Table

The general characteristics of the included studies.

| Study characteristics |              |      |         |         |          | Participants characteristics |     |             |                     |                |                     |
|-----------------------|--------------|------|---------|---------|----------|------------------------------|-----|-------------|---------------------|----------------|---------------------|
| Title                 | First Author | Year | Journal | Country | Language | Age                          | Sex | Sample size | Number for analysis | Duration of UC | Diagnostic criteria |
|                       |              |      |         |         |          |                              |     |             |                     |                |                     |
|                       |              |      |         |         |          |                              |     |             |                     |                |                     |
|                       |              |      |         |         |          |                              |     |             |                     |                |                     |

\* UC: ulcerative colitis.

The specific characteristics of the included studies.

| Author<br>Year | Design characteristics |               |            |          | Intervention characteristics |      |           |        | Outcomes and measurements |                    |                       |                |
|----------------|------------------------|---------------|------------|----------|------------------------------|------|-----------|--------|---------------------------|--------------------|-----------------------|----------------|
|                | Design                 | Randomization | Allocation | Blinding | Group                        | Type | Frequency | Length | Primary outcomes          | Secondary outcomes | Follow-up time points | Drop-out rates |
|                |                        |               |            |          |                              |      |           |        |                           |                    |                       |                |
|                |                        |               |            |          |                              |      |           |        |                           |                    |                       |                |
|                |                        |               |            |          |                              |      |           |        |                           |                    |                       |                |

The data for RevMan.

| Author<br>Year | Outcome | Measurements | Time point | For continuous data |     |       |         |     |       | For dichotomous data |       |         |       |
|----------------|---------|--------------|------------|---------------------|-----|-------|---------|-----|-------|----------------------|-------|---------|-------|
|                |         |              |            | Intervention        |     |       | Control |     |       | Intervention         |       | Control |       |
|                |         |              |            | Mean                | SD* | Total | Mean    | SD* | Total | Events               | Total | Events  | Total |
|                |         |              |            |                     |     |       |         |     |       |                      |       |         |       |
|                |         |              |            |                     |     |       |         |     |       |                      |       |         |       |
|                |         |              |            |                     |     |       |         |     |       |                      |       |         |       |

\*SD: standard deviation.
